# Supplementary material for: Macrophage-mediated chronic lymphocytic leukemia cell survival is independent of APRIL signaling
Source: PubMed Central journal article supplement (PMC4979474; doi:10.1038/cddiscovery.2016.20), 2016-03-21

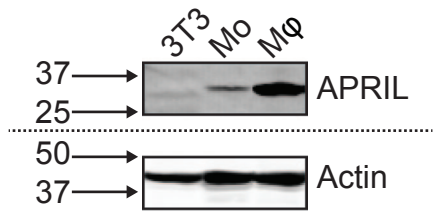

Supplement: cddiscovery201620-s3.pdf [file cddiscovery201620-s3.pdf]
